# Supplementary material for: Advancing Sea Turtle Monitoring at Nesting and Near Shore Habitats with UAVs, Data Loggers, and State of the Art Technologies
Source: MDPI journal article supplement (doi:10.3390/d16030153), 2024-02-28
Supplement: s1 [file s1]

Archive with 1 entries (1 files):
- diversity-2874630-supplementary.pdf
